# Supplementary material for: Small reorganization energy acceptors enable low energy losses in non-fullerene organic solar cells
Source: PubMed Central journal article supplement (PMC9174259; doi:10.1038/s41467-022-30927-y), 2022-06-07
Supplement: 41467_2022_30927_MOESM3_ESM.pdf [file 41467_2022_30927_MOESM3_ESM.pdf]

## Solar Cells Reporting Summary

Nature Research wishes to improve the reproducibility of the work that we publish. This form is intended for publication with all accepted papers reporting the characterization of photovoltaic devices and provides structure for consistency and transparency in reporting. Some list items might not apply to an individual manuscript, but all fields must be completed for clarity.

For further information on Nature Research policies, including our [data availability policy](#), see [Authors & Referees](#).

### ► Experimental design

#### Please check: are the following details reported in the manuscript?

##### 1. Dimensions

- Area of the tested solar cells  Yes 2 x 2 mm.  No
- Method used to determine the device area  Yes Area of the tested solar cells is 0.04 mm<sup>2</sup> defined by optical microscope.  No

##### 2. Current-voltage characterization

- Current density-voltage (J-V) plots in both forward and backward direction  Yes We only scan the device in forward direction. Generally no difference between these two direction for organic solar cells.  No
- Voltage scan conditions  Yes Forward direction, the scan voltage from -1 to 1 V with a voltage step of 10 mV and delay time of 1ms. And all of these information has been included in method section.  No  
*For instance: scan direction, speed, dwell times*
- Test environment  Yes Our devices were characterized at room temperature (ca. 25 Celsius degree) in glove box.  No  
*For instance: characterization temperature, in air or in glove box*
- Protocol for preconditioning of the device before its characterization  Yes No preconditioning protocol.  No
- Stability of the J-V characteristic  Yes Organic photovoltaic devices show no decay or instability during the test of J-V characteristics.  No  
*Verified with time evolution of the maximum power point or with the photocurrent at maximum power point; see ref. 7 for details.*

##### 3. Hysteresis or any other unusual behaviour

- Description of the unusual behaviour observed during the characterization  Yes No hysteresis or other unusual behaviour was observed during the characterization of the solar cells. In general, organic solar cells do not have hysteresis problems.  No
- Related experimental data  Yes No hysteresis or other unusual behaviour was observed during the characterization of the solar cells.  No

##### 4. Efficiency

- External quantum efficiency (EQE) or incident photons to current efficiency (IPCE)  Yes EQE is provided using Oriel Newport system (Model 66902) equipped with a standard Si diode in air condition.  No
- A comparison between the integrated response under the standard reference spectrum and the response measure under the simulator  Yes The difference between the integrated current from EQE and the short-circuit current from J-V curve measured under AM 1.5G solar simulator is within 5% difference which is within the accuracy confidence of the measurements.  No
- For tandem solar cells, the bias illumination and bias voltage used for each subcell  Yes We did not fabricate the tandem solar cells in this work.  No

##### 5. Calibration

- Light source and reference cell or sensor used for the characterization  Yes J-V curves measurements were conducted under AM 1.5 G (100mWcm<sup>-2</sup>) by Newport Thermal Oriel 91159A solar simulator, with Newport Oriel PN 91150 V Si-based solar cell as light intensity calibration reference.  No
- Confirmation that the reference cell was calibrated and certified  Yes The reference cell was calibrated and certified.  No

|                                                                                                                                                                                               |                                                                        |                                                                                                                                                                                                                                                              |
|-----------------------------------------------------------------------------------------------------------------------------------------------------------------------------------------------|------------------------------------------------------------------------|--------------------------------------------------------------------------------------------------------------------------------------------------------------------------------------------------------------------------------------------------------------|
| Calculation of spectral mismatch between the reference cell and the devices under test                                                                                                        | <input checked="" type="checkbox"/> Yes<br><input type="checkbox"/> No | Less than 3%.                                                                                                                                                                                                                                                |
| 6. Mask/aperture                                                                                                                                                                              |                                                                        |                                                                                                                                                                                                                                                              |
| Size of the mask/aperture used during testing                                                                                                                                                 | <input type="checkbox"/> Yes<br><input checked="" type="checkbox"/> No | No, we didn't use mask in this measurement. According to our previous experience, when we use mask, the Voc and Jsc are a little lower, the FF is higher, the power conversion efficiency is equivalent compared with no mask, the variation is within 0.5%. |
| Variation of the measured short-circuit current density with the mask/aperture area                                                                                                           | <input type="checkbox"/> Yes<br><input checked="" type="checkbox"/> No | No, we didn't use mask in this measurement.                                                                                                                                                                                                                  |
| 7. Performance certification                                                                                                                                                                  |                                                                        |                                                                                                                                                                                                                                                              |
| Identity of the independent certification laboratory that confirmed the photovoltaic performance                                                                                              | <input checked="" type="checkbox"/> Yes<br><input type="checkbox"/> No | We have given Certification report by National Institute of Metrology (NIM), China. in Supplementary Figure 11 .                                                                                                                                             |
| A copy of any certificate(s)<br><i>Provide in Supplementary Information</i>                                                                                                                   | <input checked="" type="checkbox"/> Yes<br><input type="checkbox"/> No | We have given Certification report by National Institute of Metrology (NIM), China. in Supplementary Figure 11 .                                                                                                                                             |
| 8. Statistics                                                                                                                                                                                 |                                                                        |                                                                                                                                                                                                                                                              |
| Number of solar cells tested                                                                                                                                                                  | <input checked="" type="checkbox"/> Yes<br><input type="checkbox"/> No | The average PCE of the OSCs is obtained from 30 independent devices.                                                                                                                                                                                         |
| Statistical analysis of the device performance                                                                                                                                                | <input checked="" type="checkbox"/> Yes<br><input type="checkbox"/> No | We have given statistical data of device performance in Table 1.                                                                                                                                                                                             |
| 9. Long-term stability analysis                                                                                                                                                               |                                                                        |                                                                                                                                                                                                                                                              |
| Type of analysis, bias conditions and environmental conditions<br><i>For instance: illumination type, temperature, atmosphere humidity, encapsulation method, preconditioning temperature</i> | <input checked="" type="checkbox"/> Yes<br><input type="checkbox"/> No | The stability of these devices were evaluated in glove box by repeating to test the J-V curves during the about 1000 storage hours at room temperature under unencapsulated condition, and the results can be seen in Supplementary Figure 13 .              |
